# Supplementary material for: Preparation of monodisperse mesoporous carbon microspheres from poly(furfuryl alcohol)–silica composite microspheres produced in a microfluidic device
Source: Royal Society of Chemistry journal article supplement (doi:10.1039/c1jm12163d), 2011-01-01
Supplement: c1jm12163d.pdf [file c1jm12163d.pdf]

## Electronic supplementary information (ESI)

# Preparation of Monodisperse Mesoporous Carbon Microspheres from Poly(furfuryl alcohol)-silica Composite Microspheres Produced in a Microfluidic Device

Ya Liu,<sup>a,b</sup> Minhua Ju,<sup>a</sup> Chongqin Wang,<sup>a</sup> Lixiong Zhang,<sup>\*a</sup> and Xiaoqin Liu<sup>a</sup>

<sup>10</sup> <sup>a</sup> State Key Laboratory of Materials-oriented Chemical Engineering, College of Chemistry and Chemical Engineering, Nanjing University of Technology, Nanjing, China. Fax: 86 25 83172263; Tel: 86 25 83172265; E-mail: lixiongzhang@yahoo.com

<sup>b</sup> College of Chemistry and Life Science, Zhejiang Normal University, Jinhua, China.

15

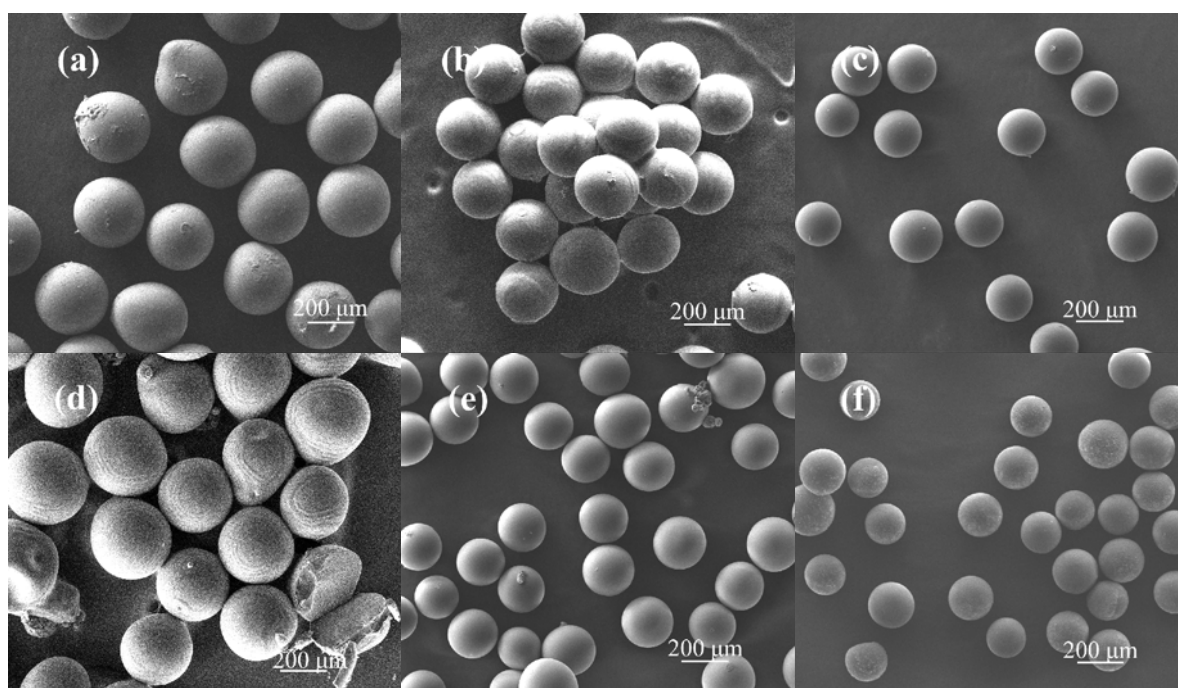

**Fig. S1** SEM images of the carbon-silica microspheres prepared at different oil phase flow rates and residence time. (a) CS1, (b) CS2, (c) CS3, (d) CS4, (e) CS5, (f) CS6.

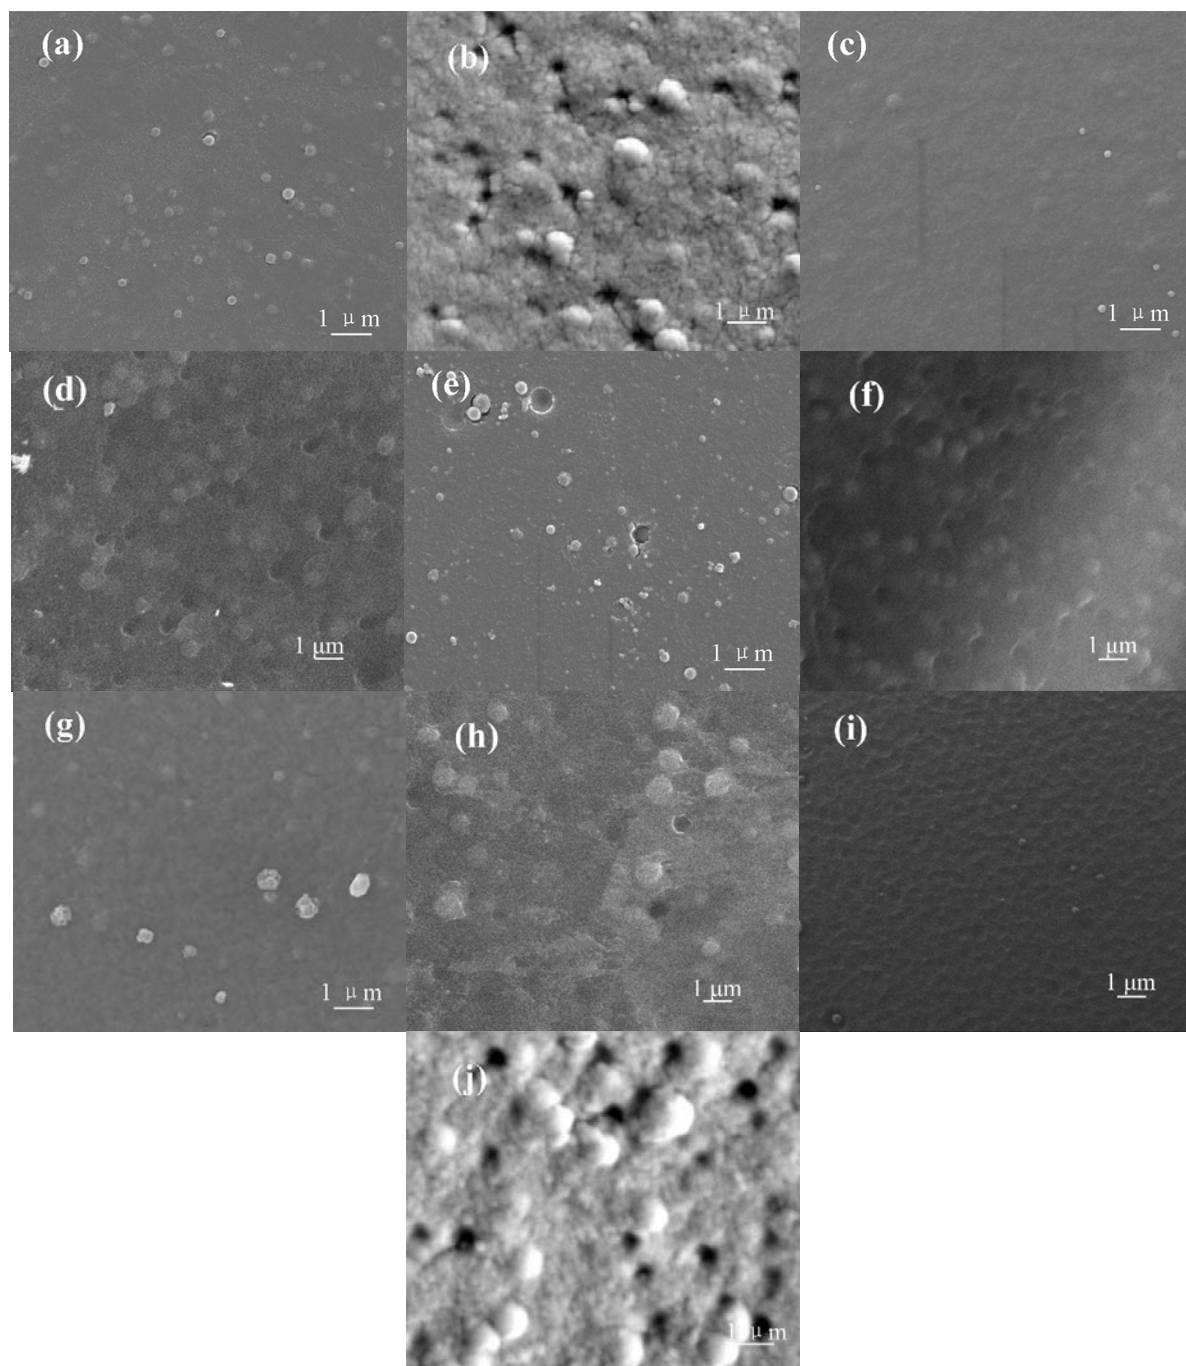

5 **Fig. S2** SEM images for the surface (a, c, e, g, i) and the internal structure (b, d, f, h, j) of carbon microspheres prepared at different oil phase flow rates and residence time. (a,b) C2, (c,d) C3, (e,f) C4, (g,h) C5, (i,j) C6.

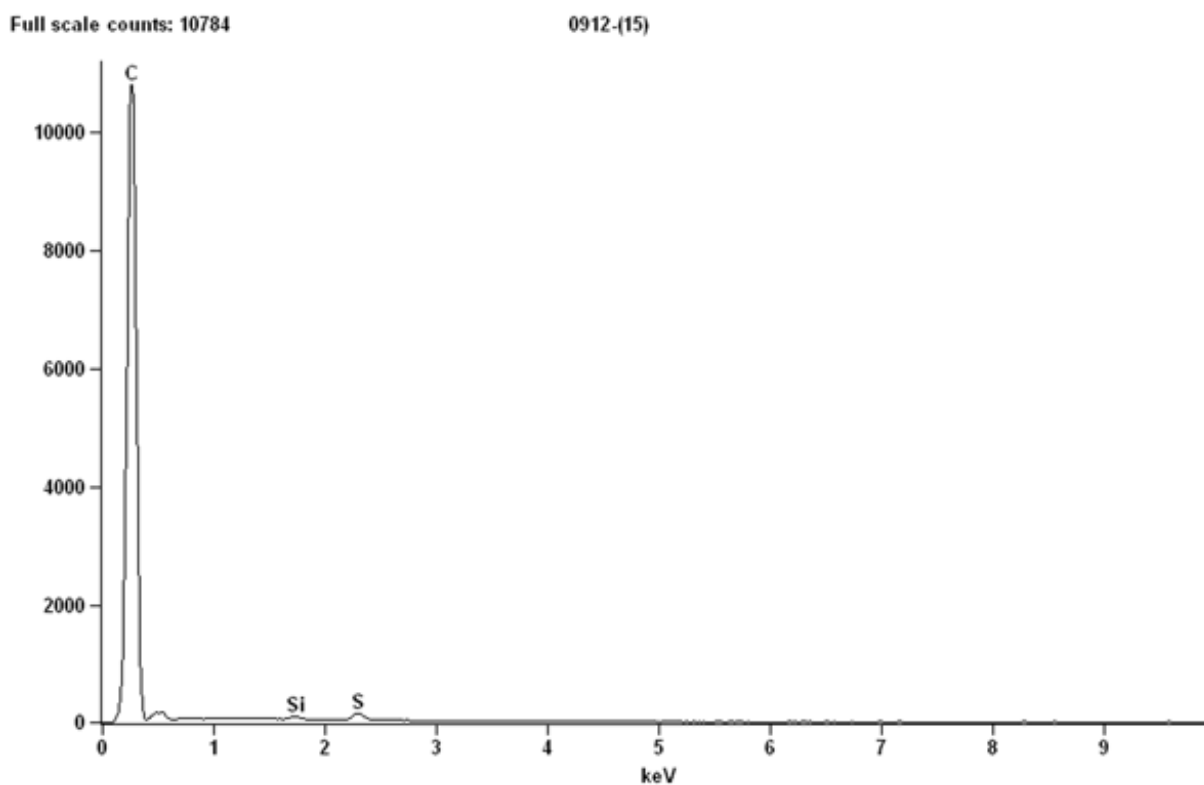

Fig. S3 EDX spectrum for sample C1.

Table S1 Quantitative Results for EDX analysis of sample C1

| Element Line | Weight (%) | Atom (%) | Formula |
|--------------|------------|----------|---------|
| C-K          | 99.66      | 99.87    | C       |
| Si-K         | 0.07       | 0.03     | Si      |
| S K          | 0.27       | 0.10     | S       |
| Total        | 100.00     | 100.00   |         |

5

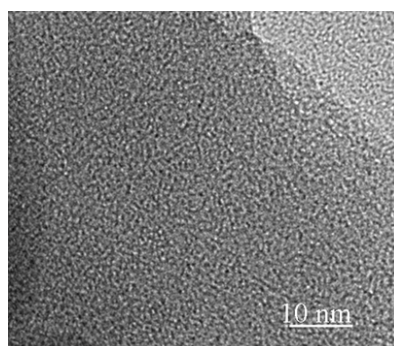

Fig. S4 TEM images of sample C1

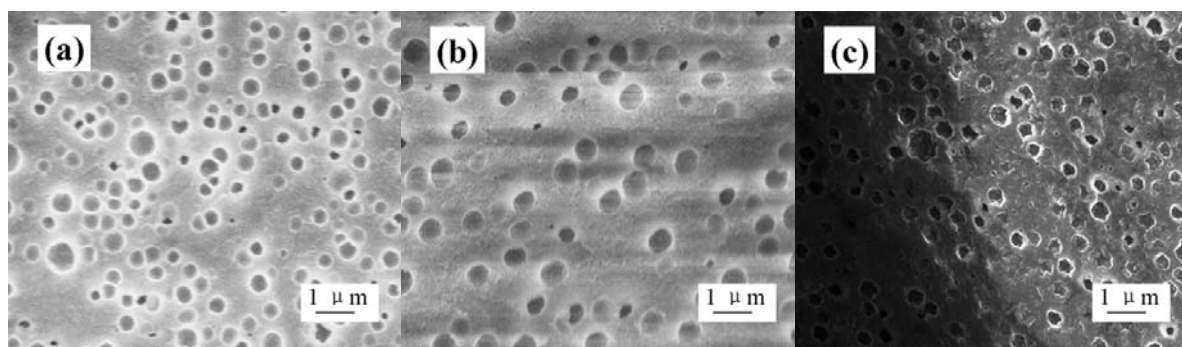

**Fig. S5** SEM images for the internal structure of silica microspheres. (a) S6, (b) S7, (c) S8.
